# Supplementary material for: Enhanced conductivity and structure stability of BiPO4@void@C/CNT particles for high-performance bismuth-based batteries
Source: Royal Society of Chemistry journal article supplement (doi:10.1039/d0dt00480d), 2020-01-01
Supplement: d0dt00480d1.pdf [file d0dt00480d1.pdf]

## Enhanced Conductivity and Structure Stability of BiPO<sub>4</sub>@void@C/CNT particles for High-Performance Bismuth-Based Battery

Ping Feng, Shu-Ang He, Zhe Cui, Qian Liu\* and Rujia Zou

State Key Laboratory for Modification of Chemical Fibers and Polymer Materials, Department of Physics, College of Materials Science and Engineering, Donghua University, Shanghai 201620, China.

E-mail: [qianliu@dhu.edu.cn](mailto:qianliu@dhu.edu.cn)

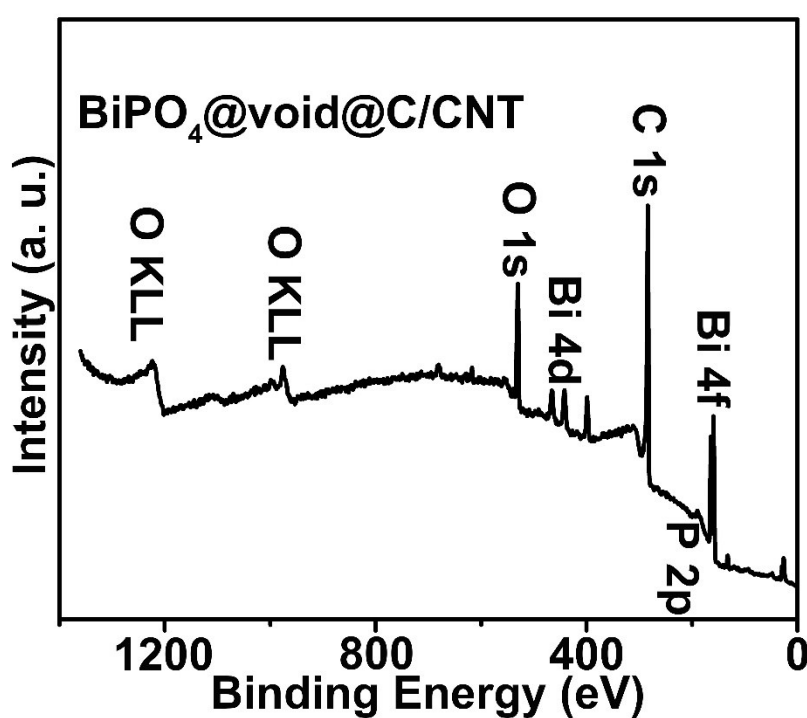

**Fig. S1** The wide scan XPS spectra for BiPO<sub>4</sub>@void@C/CNT particles.

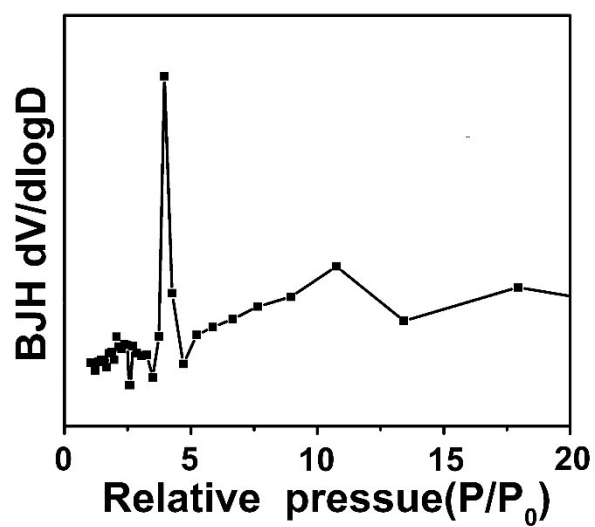

Fig. S2 The pore size distribution curve of BiPO<sub>4</sub>@void@C particles obtained from the desorption data.

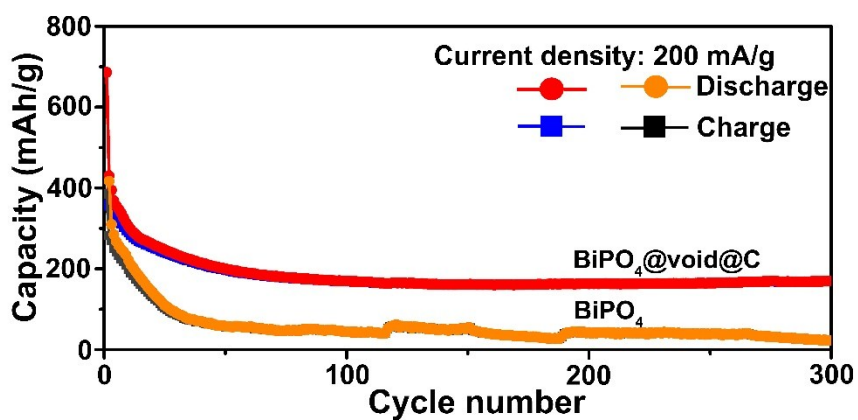

Fig. S3 Cycling performance of BiPO<sub>4</sub>@void@C particles and BiPO<sub>4</sub> under a current density of 200 mA·g<sup>-1</sup>.

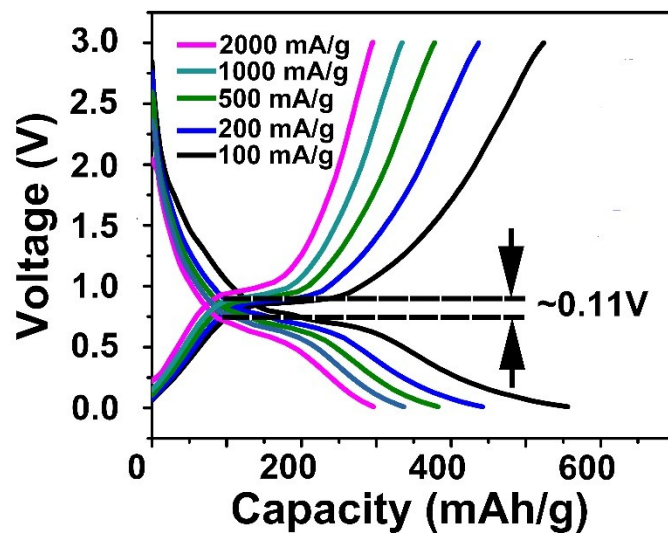

**Fig. S4** Voltage profiles show a tiny potential hysteresis of  $\sim 0.11$  V which is nearly stable when raising the rate from 100 to 2000  $\text{mA}\cdot\text{g}^{-1}$ .

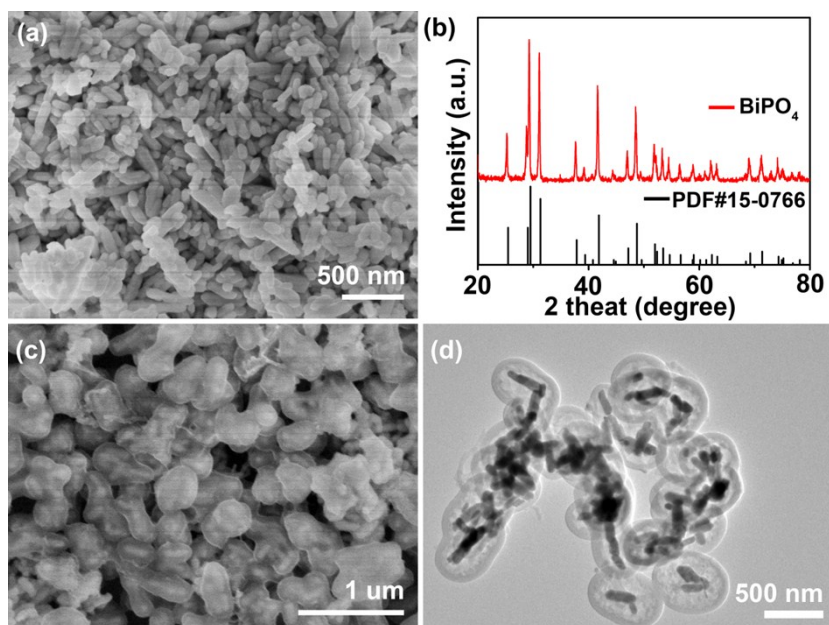

**Fig. S5** (a and b) SEM image and XRD patterns of  $\text{BiPO}_4$  nanorods. (c and d) SEM and TEM images of  $\text{BiPO}_4@void@C$  particles.

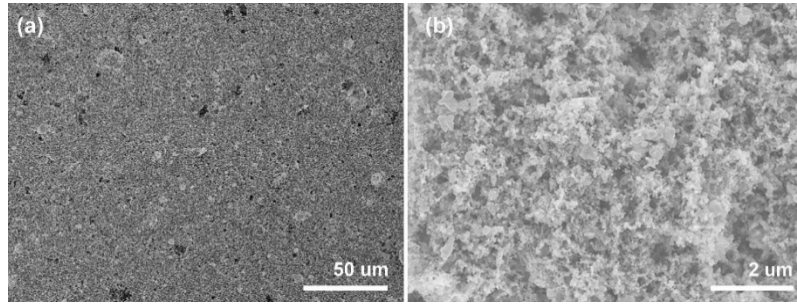

**Fig. S6** (a, b) the SEM images of the BiPO<sub>4</sub>@void@C/CNT particles electrode before cycle.

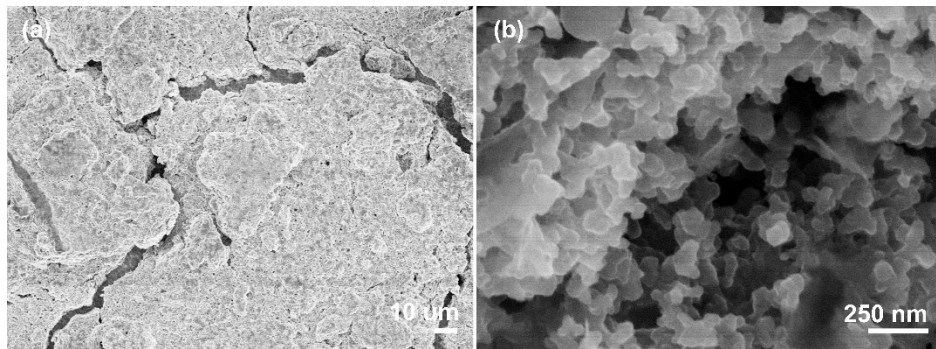

**Fig. S7** (a and b) Low-magnification and high-magnification SEM images of BiPO<sub>4</sub>@void@C particles electrode after 600th cycle.

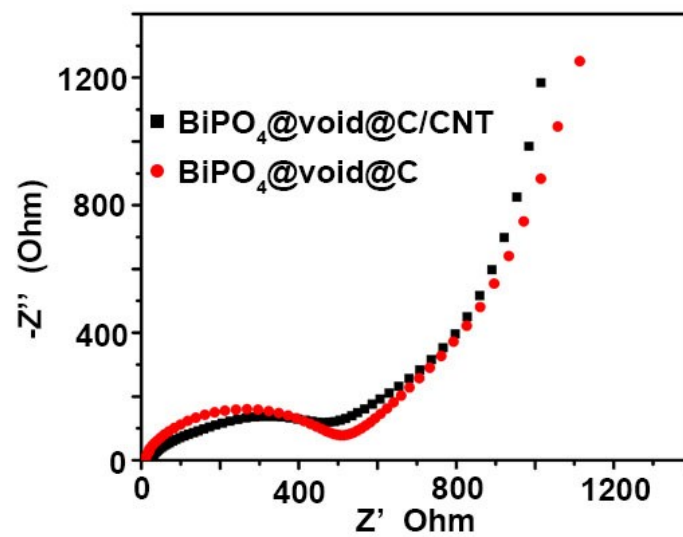

**Fig. S8** Nyquist plots for the BiPO<sub>4</sub>@void@C/CNT particle and BiPO<sub>4</sub>@void@C particle electrode before cycle.

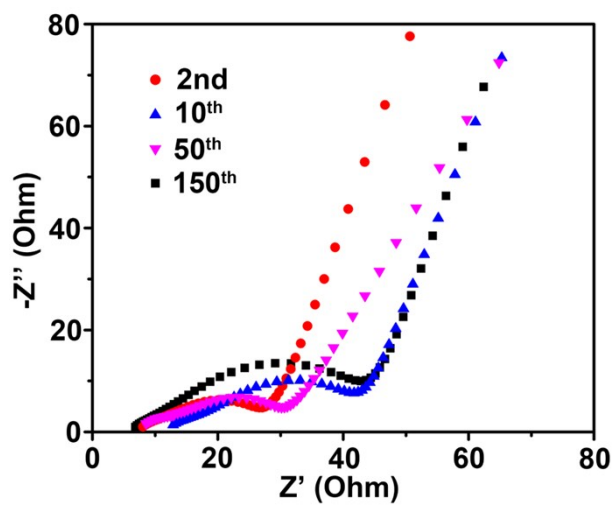

**Fig. S9** Nyquist plots for the BiPO<sub>4</sub>@void@C particles electrode.
